# Supplementary material
Source: PubMed Central journal article supplement (PMC2754194)
Supplement: NIHMS128663-supplement-1_si_001.pdf [file NIHMS128663-supplement-1_si_001.pdf]

## Supporting Online Information:

### ***Asymmetric Phosphate Stretching mode: Effects of $Mg^{2+}$***

Divalent magnesium ( $Mg^{2+}$ ) was determined to interact with the headgroup phosphate moiety of dipalmitoylphosphatidylserine (DPPS) lipid through changes observed in the frequency of the asymmetric phosphate stretch. Binary DPPS/ perdeuterated dipalmitoylphosphatidylcholine (DPPC- $d_{62}$ ) lipid assemblies were prepared using 3:2 mole ratio of  $Mg^{2+}$ / total lipid. The spectra were acquired at 25°C. A fully hydrated DPPS phosphate headgroup exhibits a characteristic asymmetric phosphate stretching mode at 1221  $cm^{-1}$ , as shown is figure S1a.<sup>1</sup> Upon binding inclusion of  $Mg^{2+}$ , the frequency of this vibrational mode in pure DPPS solution is observed to shift from 1221 to 1241  $cm^{-1}$  (Fig S1b). This is in agreement with observations made using divalent calcium ( $Ca^{2+}$ ), where the asymmetric phosphate stretching mode shifts to 1238  $cm^{-1}$ .<sup>1</sup> The characteristic shift in the phosphate mode is also observed for the binary assemblies of 1:1 (Fig S2), 3:1 (Fig. S3), and 9:1 (Fig. S4) of DPPS to DPPC- $d_{62}$ , respectively. The infrared spectra of the lipid assemblies obtained in the presence of  $Mg^{2+}$  continue to exhibit intensity in the unbound, hydrated, band at 1221  $cm^{-1}$ . This is consistent with the PS/  $Mg^{2+}$  binding expected from the reported binding constant.<sup>2,3</sup> Interestingly, the phosphate moiety for a pure DPPC- $d_{62}$  assembly, shown in figure S5, shows no change in the asymmetric stretching mode upon inclusion of  $Mg^{2+}$ . The DPPC- $d_{62}$  assemblies exhibit a broad vibrational band centered at 1233  $cm^{-1}$ , both with and without  $Mg^{2+}$ . These results strongly indicate that the  $Mg^{2+}$  binds selectively to the phosphate moieties of the DPPS lipids and does not directly interact with the DPPC- $d_{62}$  lipid component.

## References:

- (1) Dluhy, R.; Cameron, D. G.; Mantsch, H. H.; Mendelsohn, R. Fourier transform infrared spectroscopic studies of the effect of calcium ions on phosphatidylserine *Biochem.* **1983**, *22*, 6318.

(2) Nir, S.; Bentz, J. On the forces between phospholipid bilayers *J. Coll. Interf. Sci.* **1978**, *65*, 399.

(3) Duzgunes, N.; Nir, S.; Wilschut, J.; Bentz, J.; Newton, C.; Portis, A.; Papahadjopoulos, D. Calcium- and magnesium-induced fusion of mixed phosphatidylserine/phosphatidylcholine vesicles: Effect of ion binding *J. Membr. Biol.* **1981**, *59*, 115.

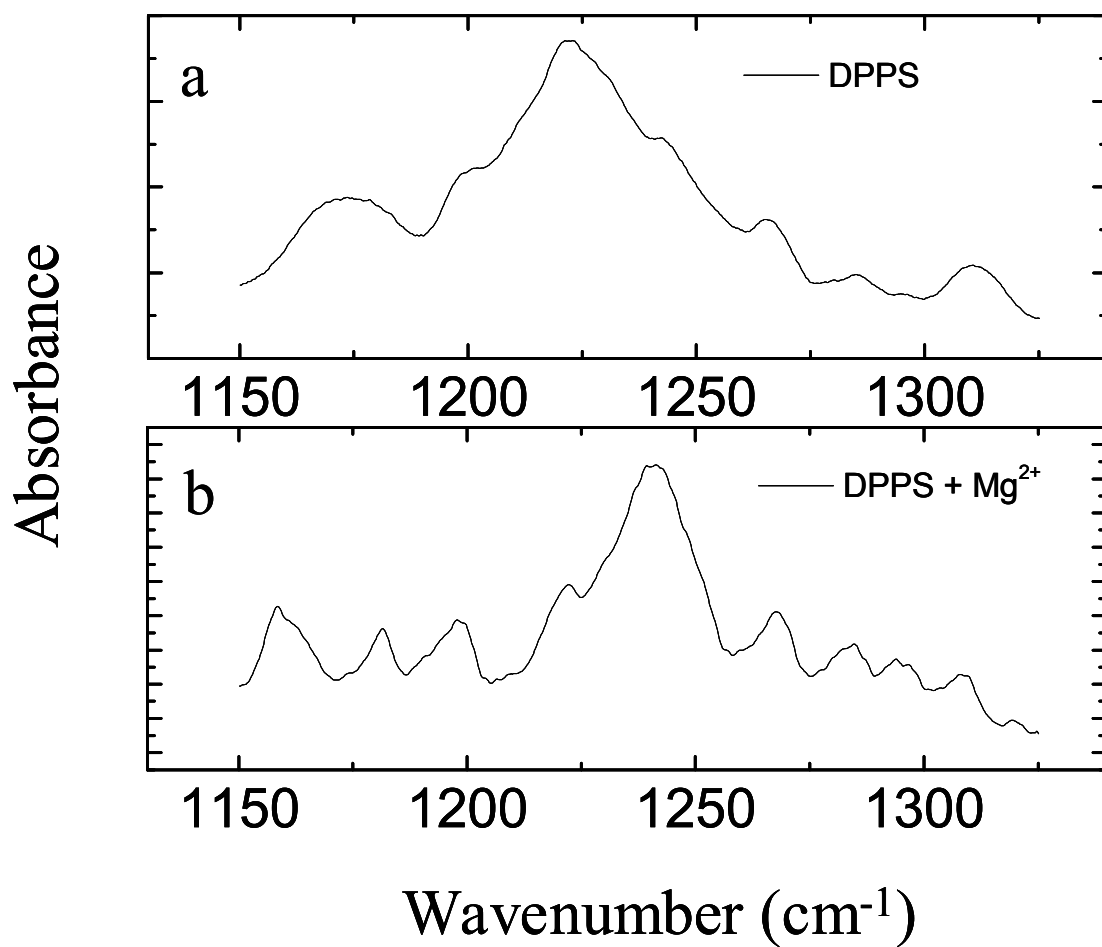

**Figure S1.** Infrared vibrational spectra obtained showing the asymmetric phosphate stretching mode for DPPS in the absence (a) and presence (b) of Mg<sup>2+</sup>.

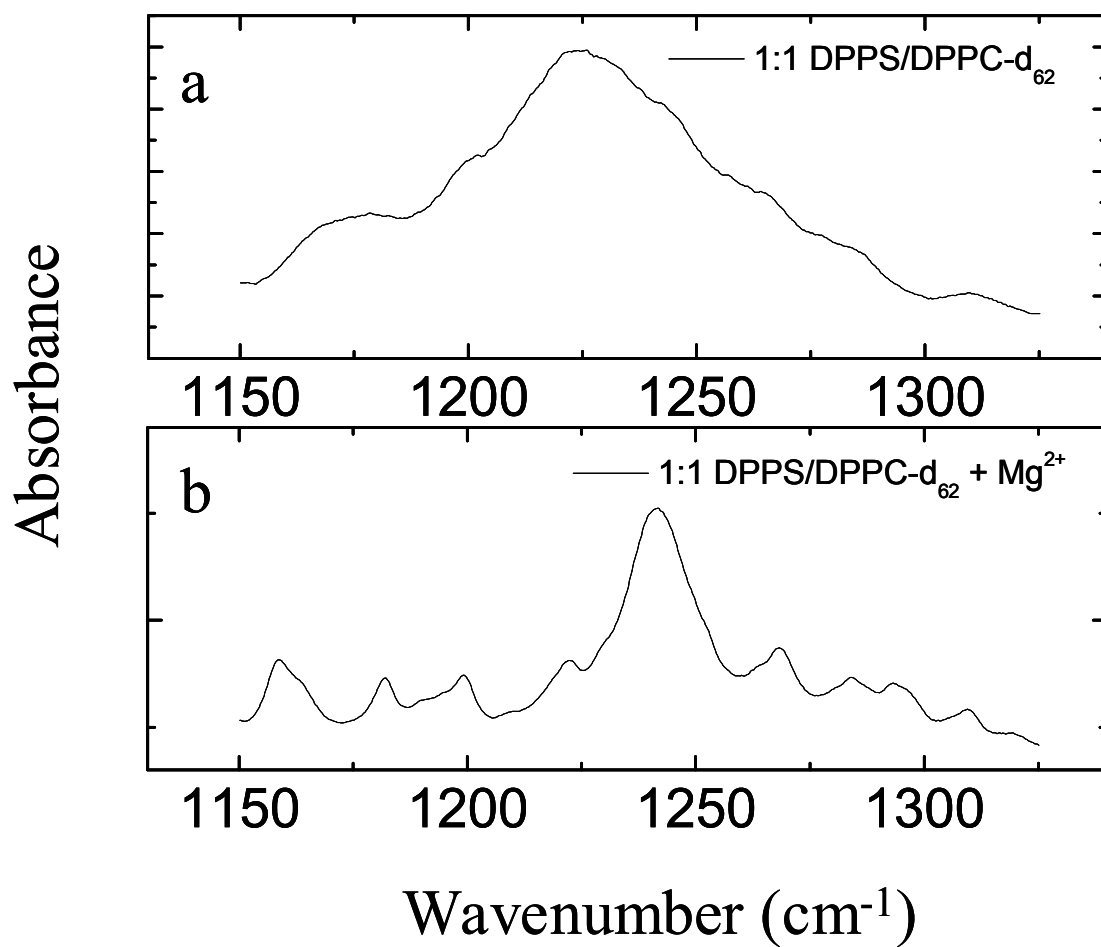

**Figure S2.** Infrared vibrational spectra obtained showing the asymmetric phosphate stretching mode for a 1:1 DPPS/DPPC-d<sub>62</sub> assembly in the absence (a) and presence (b) of Mg<sup>2+</sup>.

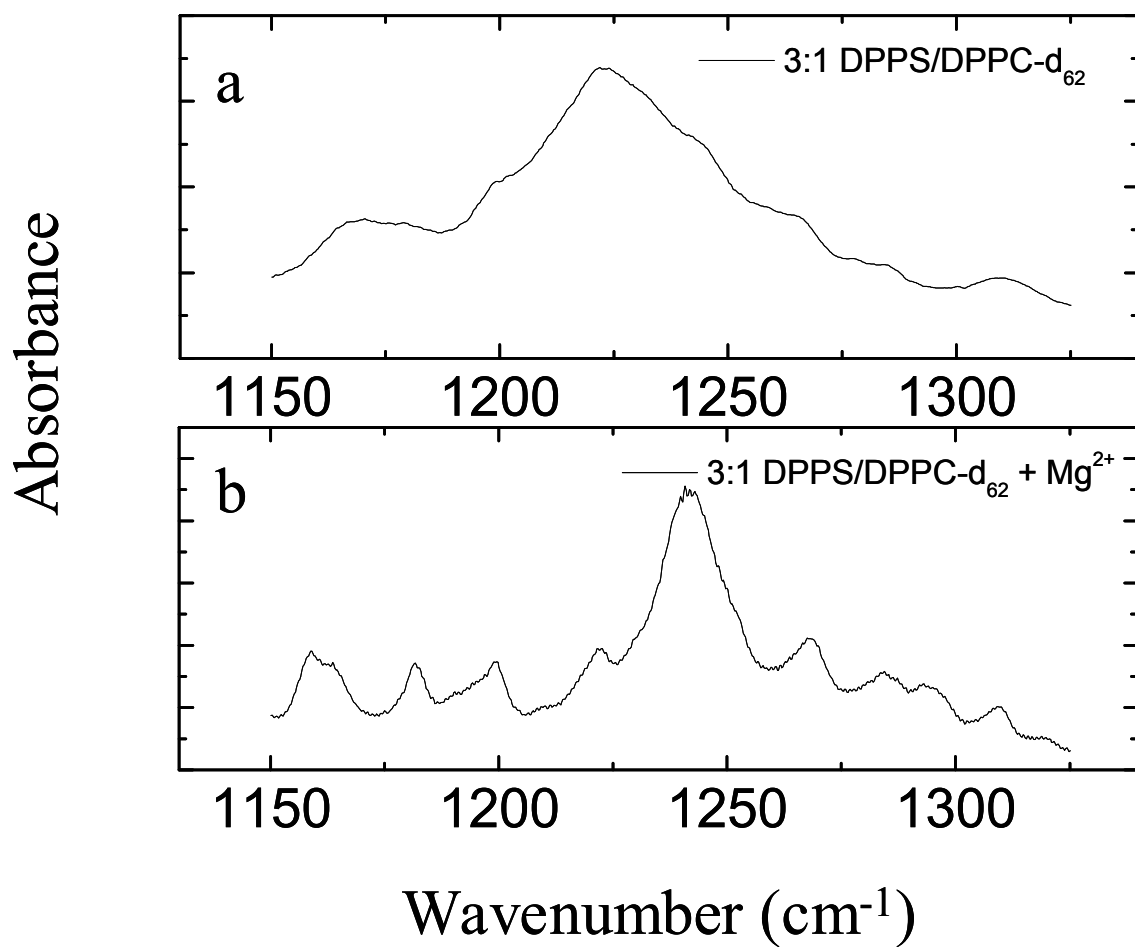

**Figure S3.** Infrared vibrational spectra obtained showing the asymmetric phosphate stretching mode for a 1:1 DPPS/DPPC-d<sub>62</sub> assembly in the absence (a) and presence (b) of Mg<sup>2+</sup>.

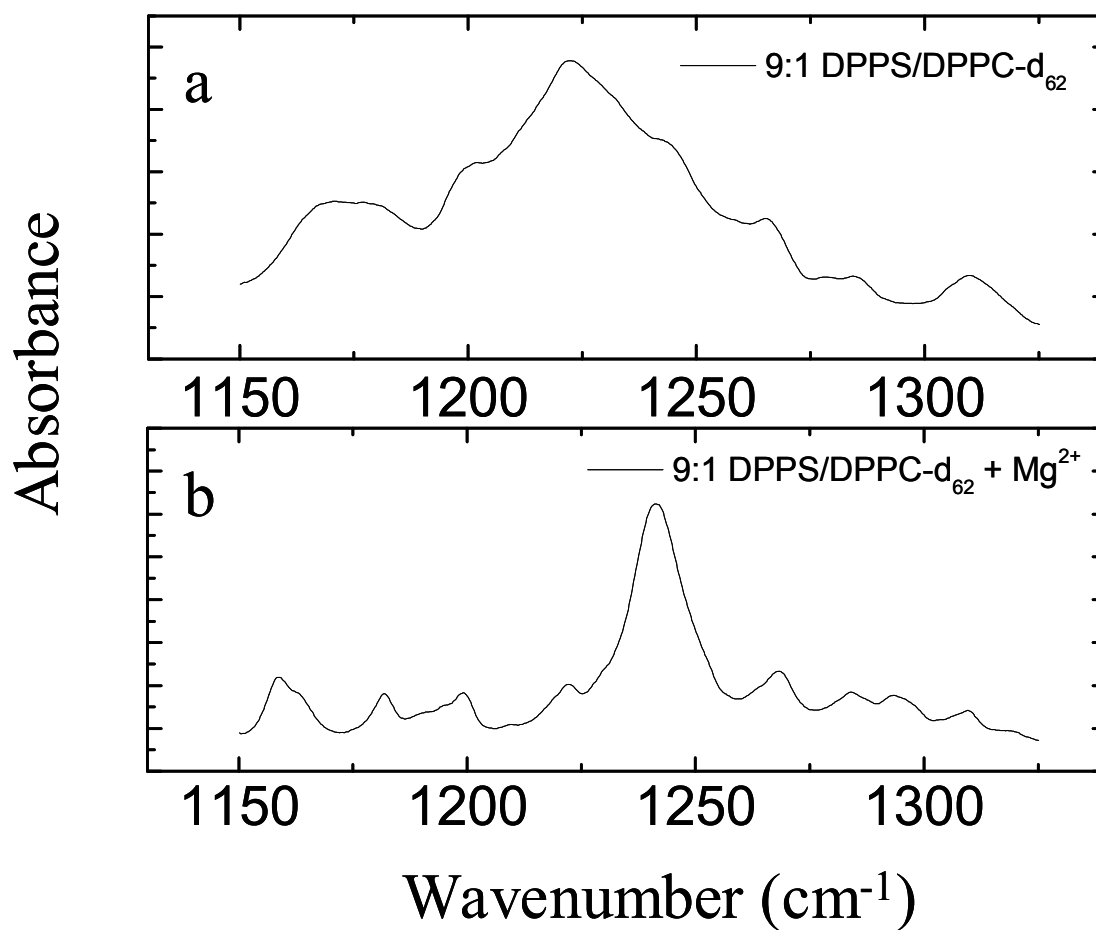

**Figure S4.** Infrared vibrational spectra obtained showing the asymmetric phosphate stretching mode for a 9:1 DPPS/DPPC-d<sub>62</sub> assembly in the absence (a) and presence (b) of Mg<sup>2+</sup>.

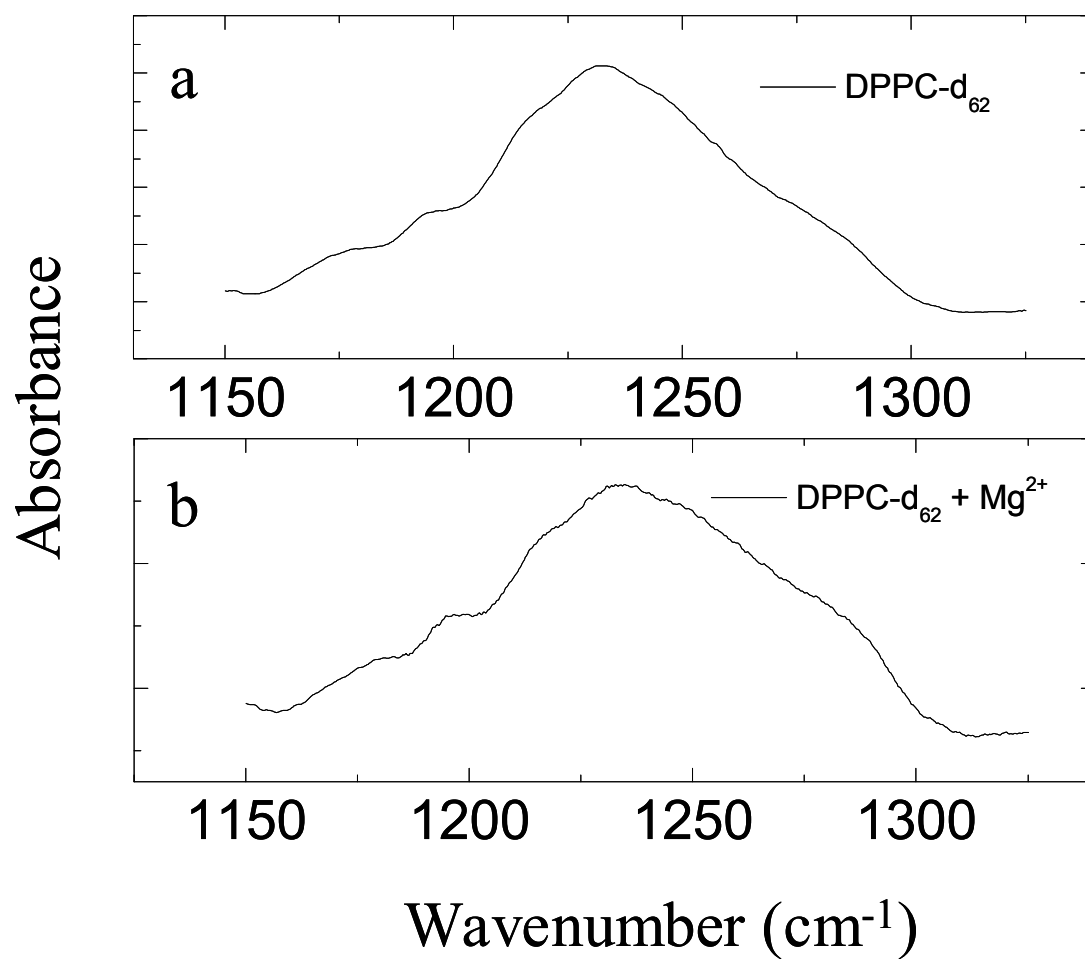

**Figure S5.** Infrared vibrational spectra obtained showing the asymmetric phosphate stretching mode for a DPPC-d<sub>62</sub> assembly in the absence (a) and presence (b) of Mg<sup>2+</sup>.
